# Supplementary material
Source: bioRxiv or medRxiv preprint supplement (https://www.biorxiv.org/highwire/filestream/30388/field_highwire_adjunct_files/0/106203-1.pdf)

Supplementary method.

Supplementary Figure 1. To determine the number of ancestry components to control the log-Likelihoods and residual errors (square root of the residual variance) from linear regression models of the three traits on age, sex, and up to twenty principal components were examined. Based on these data, the optimal number of components to adjust for was seven for *g*, Years of Education, Digit Symbol Test, Vocabulary, and extraversion. Six were controlled for using logical memory, four for verbal fluency test, and nine were used for neuroticism.

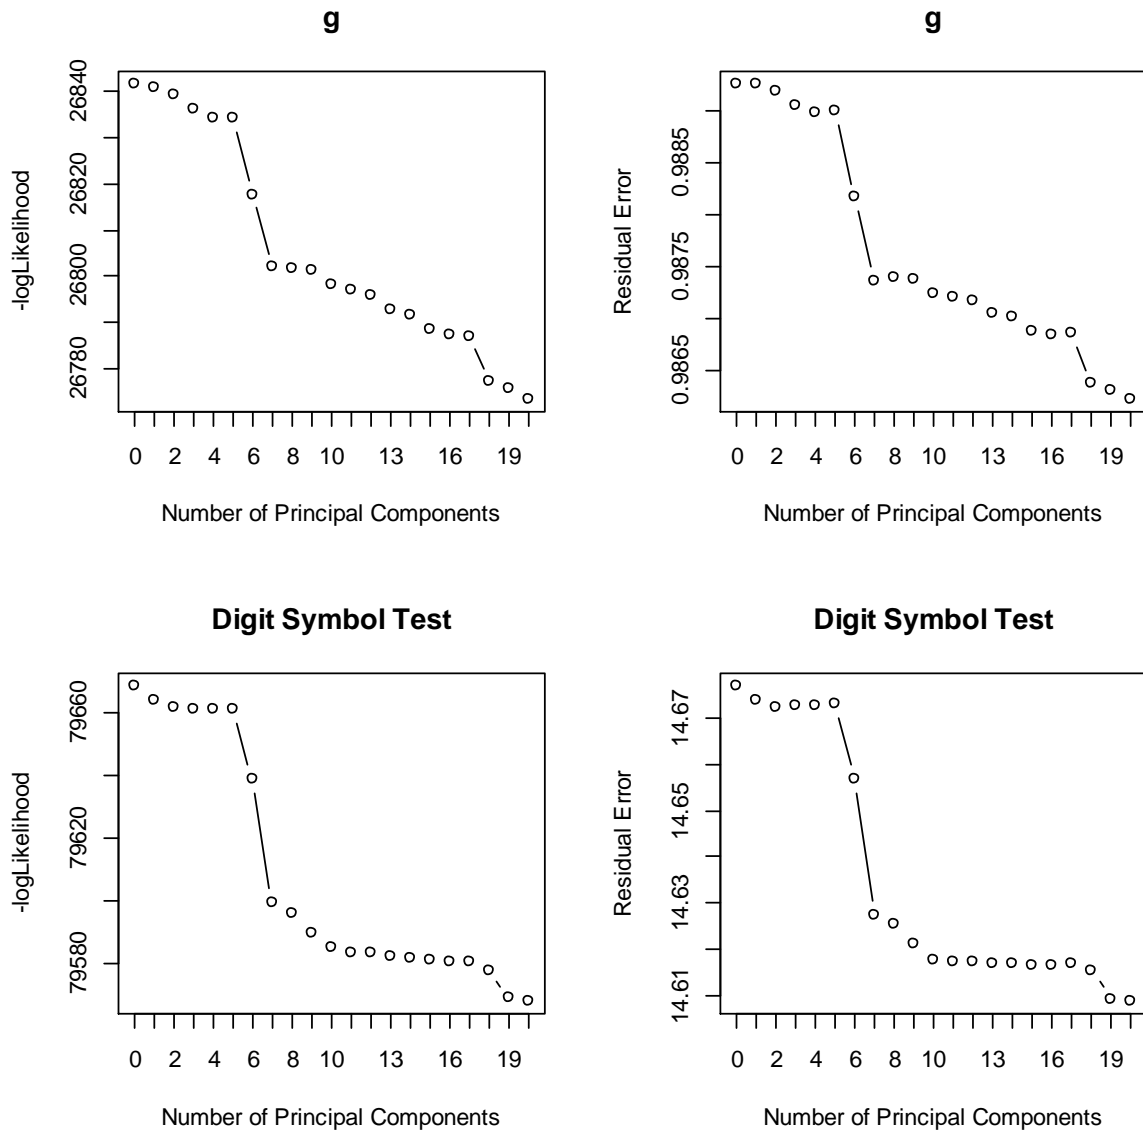

**Logical Memory**

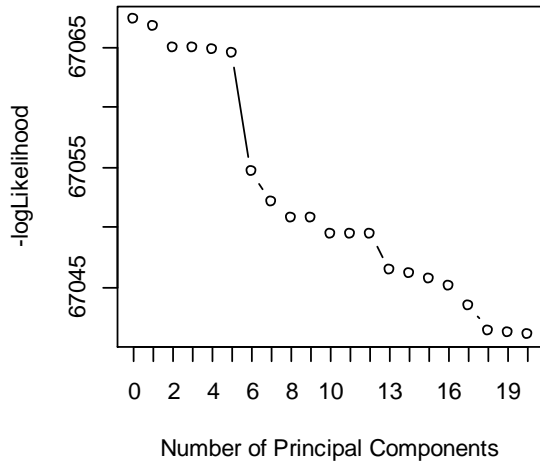

**Logical Memory**

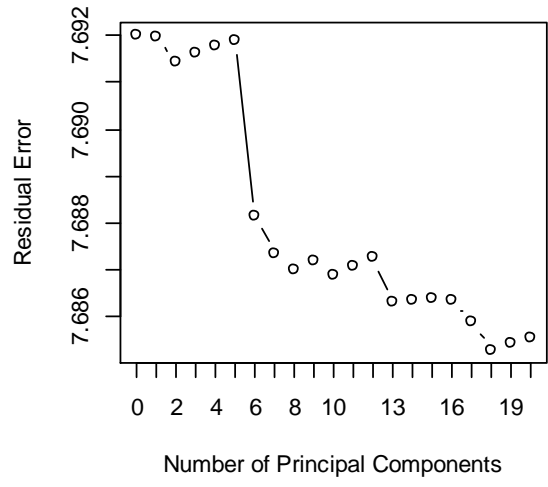

**Vocabulary**

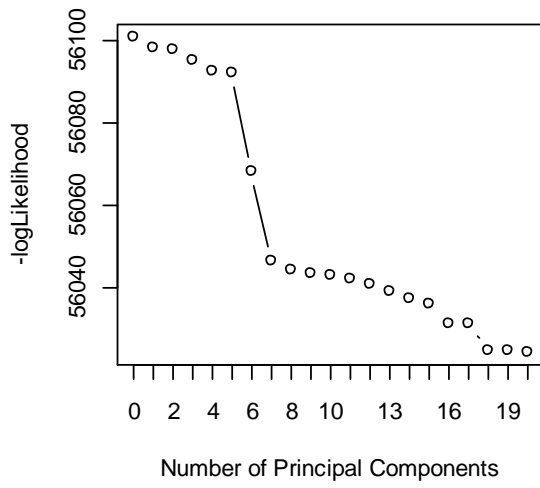

**Vocabulary**

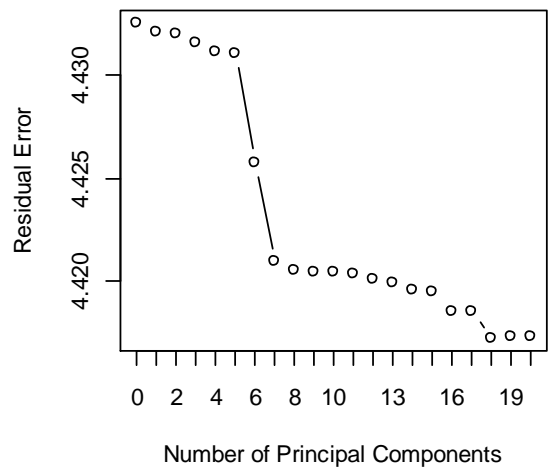

**Verbal Fluency Test**

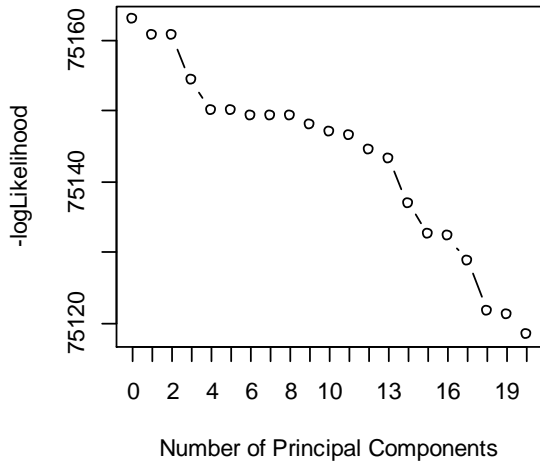

**Verbal Fluency Test**

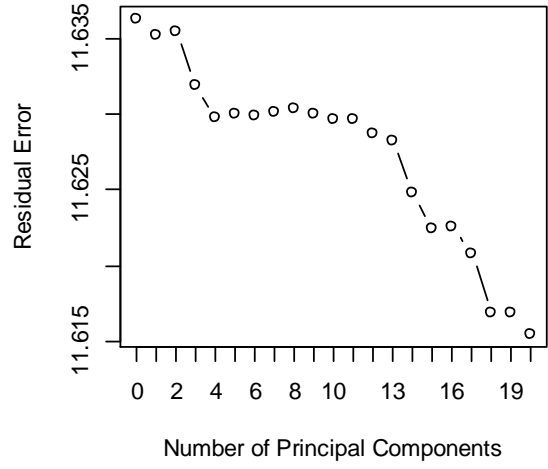

**Years of Education**

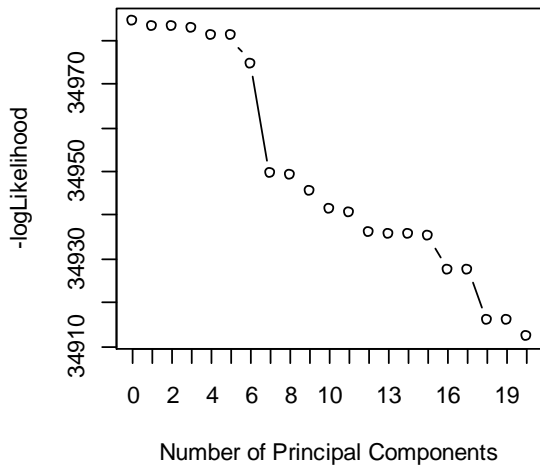

**Years of Education**

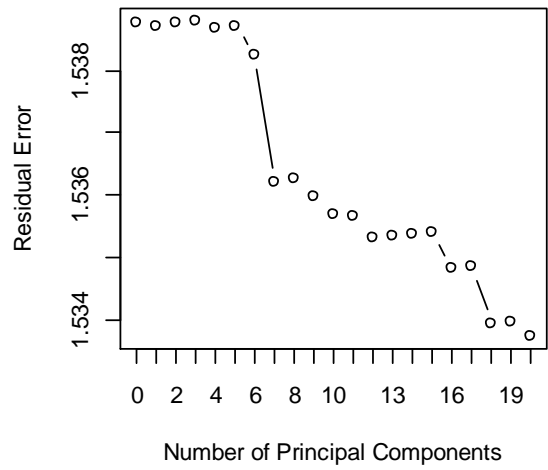

**Neuroticism**

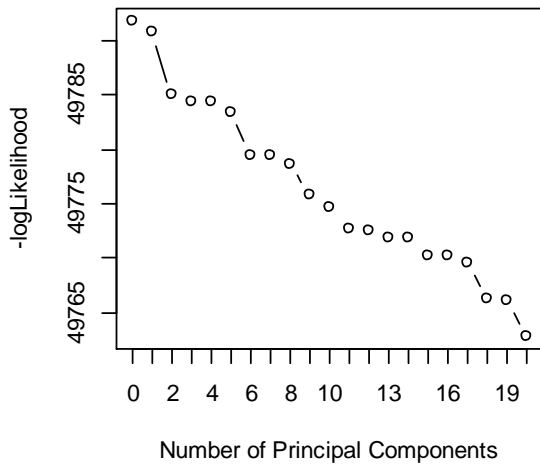

**Neuroticism**

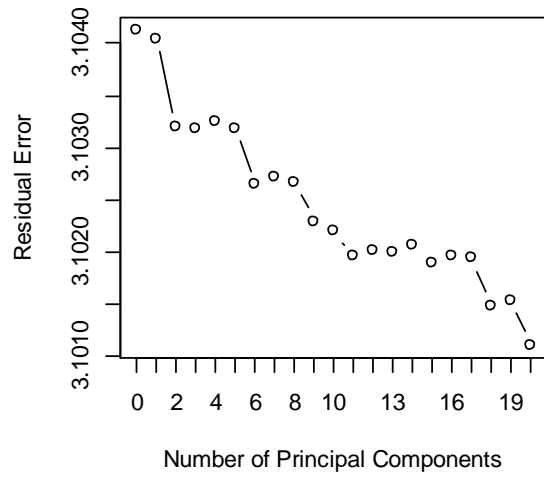

**Extraversion**

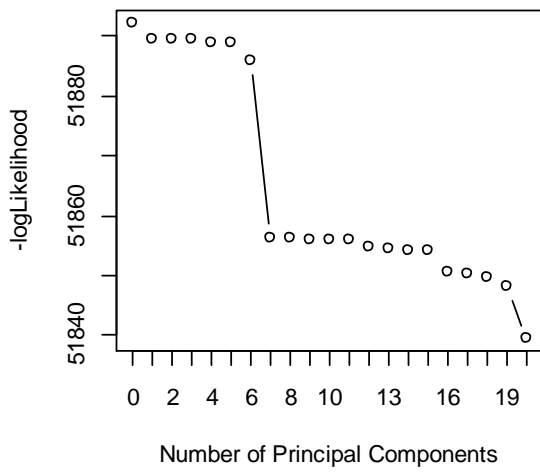

**Extraversion**

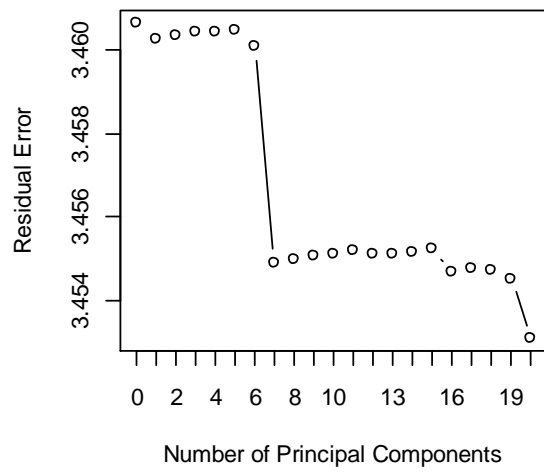

Supplement: Supplementary file [file 106203-1.pdf]
